# Supplementary material for: Decomposition of methanol-d4 on Rh nanoclusters supported by thin-film Al2O3/NiAl(100) under near-ambient-pressure conditions
Source: Royal Society of Chemistry journal article supplement (doi:10.1039/d3cp05303b), 2024-01-01
Supplement: d3cp05303b1.pdf [file d3cp05303b1.pdf]

## Supplementary Information

### **Decomposition of Methanol-d<sub>4</sub> on Rh nanoclusters supported by thin film Al<sub>2</sub>O<sub>3</sub>/NiAl(100) under near-ambient-pressure conditions**

**Guan-Jr Liao<sup>a</sup>, Wen-Hao Hsueh<sup>b</sup>, Yu-Hsiang Yen<sup>a</sup>, Yi-Chan Shih<sup>a</sup>, Chia-Hsin Wang<sup>c</sup>, Jeng-Han Wang<sup>b,\*</sup> and Meng-Fan Luo<sup>a,\*</sup>**

*<sup>a</sup>Department of Physics, National Central University, No. 300 Jhongda Road, Jhongli 32054, Taiwan*

*<sup>b</sup>Department of Chemistry, National Taiwan Normal University, No. 88, Sec. 4, Ting-Zhou Road, Taipei, Taiwan*

*<sup>c</sup>National Synchrotron Radiation Research Center, 101 Hsin-Ann Road, Hsinchu Science Park, Hsinchu 30076, Taiwan*

Corresponding authors' Emails:

[mfl28@phy.ncu.edu.tw](mailto:mfl28@phy.ncu.edu.tw) (M.F. Luo); [jenghan@ntnu.edu.tw](mailto:jenghan@ntnu.edu.tw) (J.H. Wang)

Figures S1a-c exemplify the STM images for 0.13-, 0.25- and 4.0-ML Rh clusters grown on a thin film of Al<sub>2</sub>O<sub>3</sub>/NiAl(100) at 300 K. Their size distributions (diameters and heights) are shown in the histograms (insets of the figures). By using the measured mean diameter, height and cluster density for each coverage, we may estimate the surface area of clusters, as a measure of the numbers of Rh surface sites, for each Rh coverage. Table S1 lists the Rh surface areas derived by assuming a half-ellipsoid shape for the cluster.

Figure S2 shows Rh 3d NAP-PES spectra from Al<sub>2</sub>O<sub>3</sub>/NiAl(100) exposed to CD<sub>3</sub>OD at increased pressure from  $5 \times 10^{-3}$  to 0.5 mbar, as indicated, at sample temperature 400 K. Except the negative shift of Rh 3d line induced by increased CD<sub>3</sub>OD pressure, the line shape altered little with the pressure, suggesting little altered cluster structures.

Figure S3 shows the density of states (DOS) of surface Rh *d* band in the four models **Rh<sub>C</sub>**, **Rh(100)**, **Rh<sub>C</sub>-OH** and **Rh(100)<sub>OH</sub>**. The comparison reveals that **Rh<sub>C</sub>** has the highest *d*-band center (-1.95 eV), implying a stronger interaction with adsorbates. The result also shows that the **Rh<sub>C</sub>** model, the **Rh<sub>38</sub>** cluster, has a great electronic density across the Fermi level, indicating a metallic character.

Figure S4 shows the charge distribution for CH<sub>3</sub>OH\* on **Rh(100)** and **Rh(100)<sub>OH</sub>**. The formation of hydrogen bond, circled in the plot, enhances the adsorption and

reduces the activation energy for the O-H scission of  $\text{CH}_3\text{OH}^*$ , the initial and also rate-determining step in the methanol decomposition. The promotion in  $E_{ads}$  by the hydrogen bonds is also observed in other intermediates, including  $\text{CH}_3\text{O}^*$ ,  $\text{CH}_2\text{O}^*$ ,  $\text{CHO}^*$ , in the methanol decomposition. Figure S5a compares  $E_{ads}$  of  $\text{CH}_3\text{O}^*$ ,  $\text{CH}_2\text{O}^*$  and  $\text{CHO}^*$  on **Rh<sub>C</sub>**, **Rh(100)** (without hydrogen bonds), **Rh<sub>C-OH</sub>** and **Rh(100)<sub>OH</sub>** (with hydrogen bonds). Figure S5b illustrates the corresponding adsorption configurations (with hydrogen bonds) on **Rh<sub>C-OH</sub>** and **Rh(100)<sub>OH</sub>**.

Figure S6 compares  $E_a$  for the C-H cleavages of  $\text{CH}_3\text{O}^* \rightarrow \text{CH}_2\text{O}^* \rightarrow \text{CHO}^* \rightarrow \text{CO}^*$  on **Rh<sub>C</sub>**, **Rh(100)** (without hydrogen bond), **Rh<sub>C-OH</sub>** and **Rh(100)<sub>OH</sub>** (with hydrogen bond). The hydrogen bond also alters the subsequent dehydrogenation; it could increase or decrease the activation energies. Nevertheless, the alteration is only modest; it is not as great as that for the O-H scission of  $\text{CH}_3\text{OH}^*$  on **Rh<sub>C-OH</sub>**.

**Figure S1**

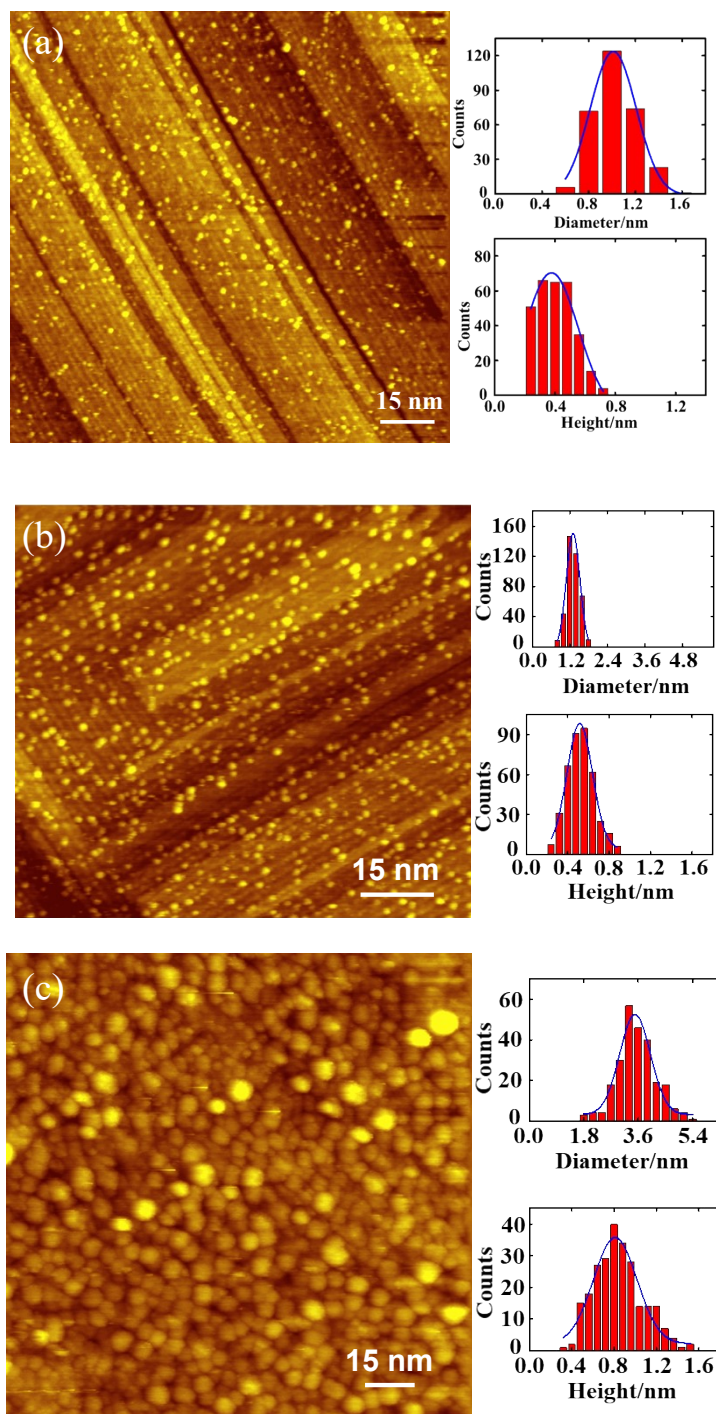

**Figure S1.** STM image for (a) 0.13-, (b) 0.25- and (c) 4.0-ML Rh deposited on a thin film of  $\text{Al}_2\text{O}_3/\text{NiAl}(100)$  at 300 K. The insets show characteristic histograms of height and diameter of the clusters; the curves are the best Gaussian fits to the distributions.

**Table S1**

| Coverage (ML) | Mean Height (nm) | Mean Diameter (nm) | Surface Area (nm <sup>2</sup> ) /per cluster | Surface Area (cm <sup>2</sup> ) /cm <sup>2</sup> |
|---------------|------------------|--------------------|----------------------------------------------|--------------------------------------------------|
| 0.13          | 0.41             | 1.1                | 3.18                                         | 0.31                                             |
| 0.25          | 0.52             | 1.3                | 4.64                                         | 0.48                                             |
| 1             | 0.78             | 1.8                | 9.32                                         | 1.49                                             |
| 4             | 0.8              | 3.6                | 25.71                                        | 4.16                                             |

**Table S1.** The Rh surface area per cm<sup>2</sup> for each Rh coverage and that for a single cluster at its mean size for each Rh coverage investigated. The surface area for a single cluster was derived by assuming a half-ellipsoid shape for a cluster. The total surface area per cm<sup>2</sup> for each coverage was obtained by the surface area of a single cluster multiplied by the cluster density per cm<sup>2</sup>.

Figure S2

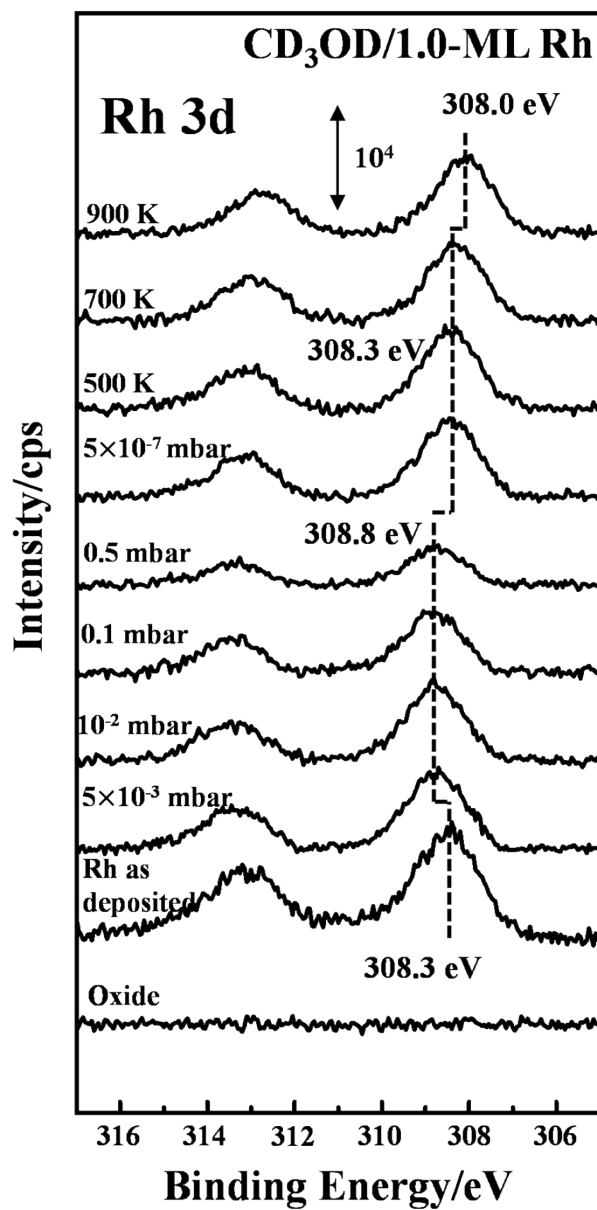

**Figure S2.** Rh 3d NAP-PES spectra from Al<sub>2</sub>O<sub>3</sub>/NiAl(100) exposed to CD<sub>3</sub>OD at increased pressure from  $5 \times 10^{-3}$  to 0.5 mbar, as indicated. The Rh clusters were grown at 300 K and the sample temperature was maintained at 400 K for exposure to CD<sub>3</sub>OD.

**Figure S3**

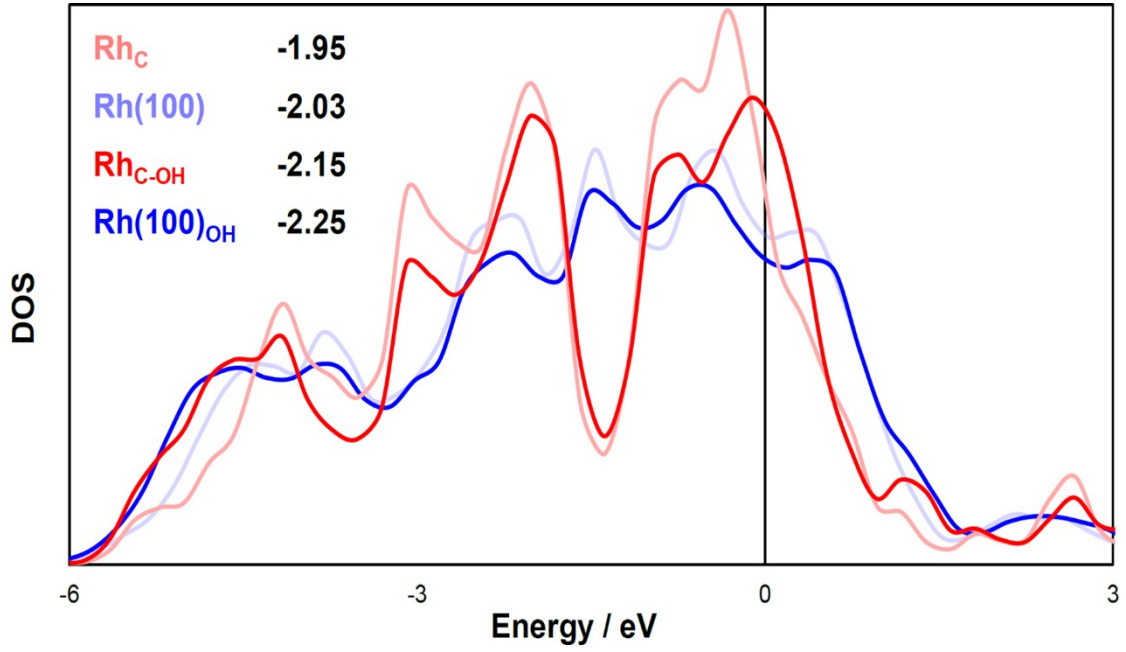

**Figure S3.** Density of states (DOS) of surface Rh *d* band in **Rh<sub>C</sub>**, **Rh(100)**, **Rh<sub>C</sub>-OH** and **Rh(100)<sub>OH</sub>**. The energy 0 indicates the Fermi level and the related *d*-band centers, in eV, are numbered in the plot. The *d*-band centers were determined by the following equation:

$$\frac{\int_{-\infty}^{E_F} E \rho_d(E) dE}{\int_{-\infty}^{E_F} \rho_d(E) dE},$$

for which  $E$  is the energy,  $E_F$  is the Fermi energy and  $\rho_d(E)$  is the projected *d* band density of state (DOS) of the transition metal.

**Figure S4**

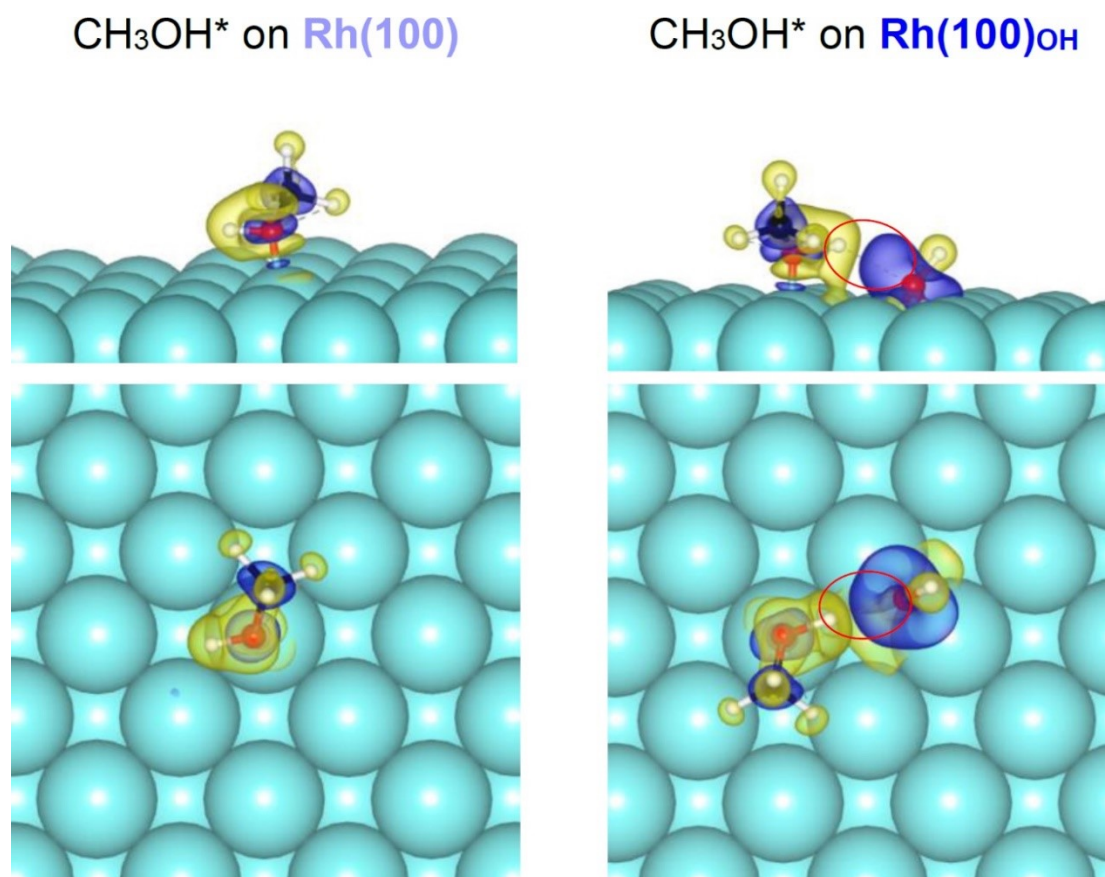

**Figure S4.** Charge plots for  $\text{CH}_3\text{OH}^*$  on **Rh(100)** and **Rh(100)<sub>OH</sub>**. Hydrogen bond between  $\text{CH}_3\text{OH}^*$  and surface  $\text{OH}^*$  on **Rh(100)<sub>OH</sub>** is circled; yellow and blue isosurfaces represent positively and negatively induced charges, respectively.

Figure S5

(a)

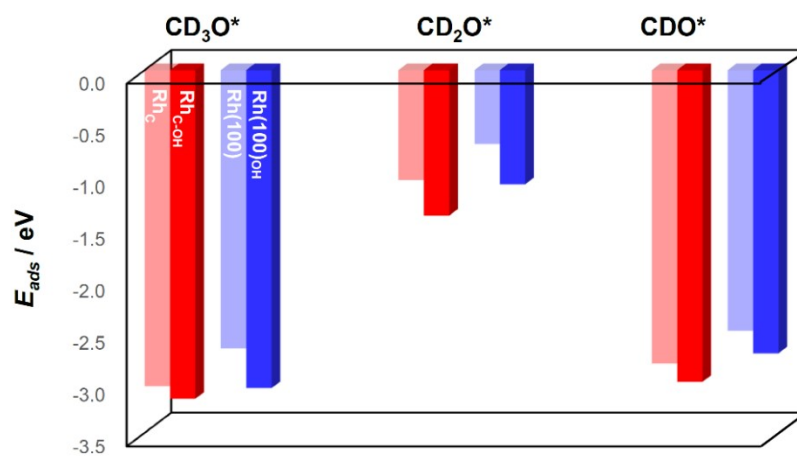

(b)

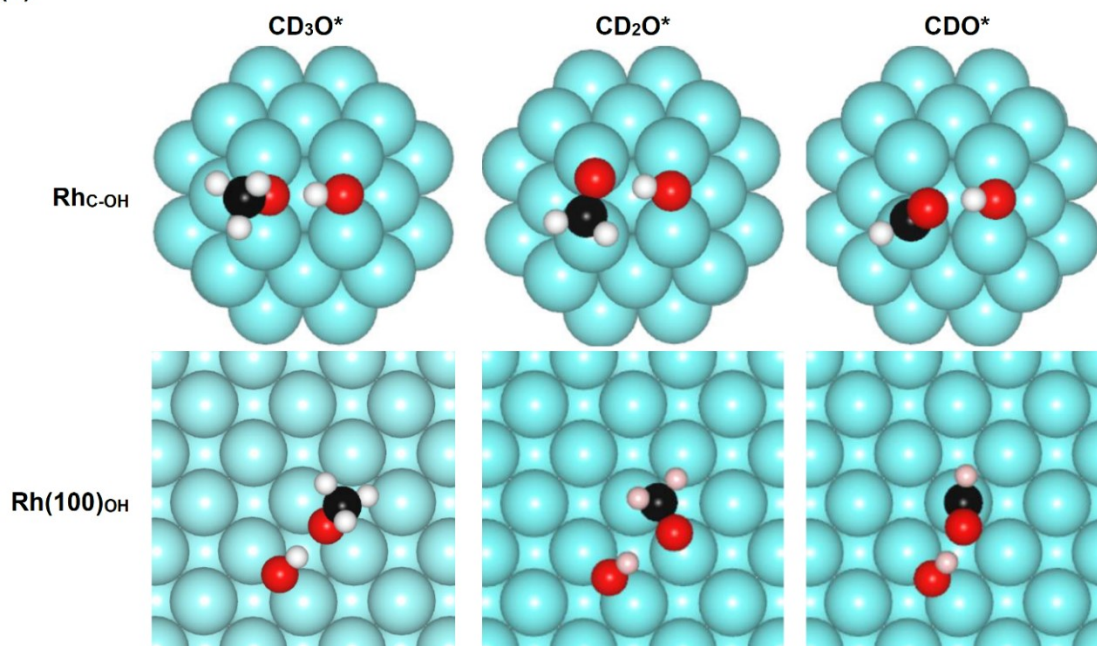

**Figure S5.** (a) Comparison of  $E_{ads}$  of  $CH_3O^*$ ,  $CH_2O^*$  and  $CHO^*$  on  $Rh_C$  and  $Rh(100)$  without hydrogen bonds, and on  $Rh_C-OH$  and  $Rh(100)-OH$  with hydrogen bonds. (b) The

corresponding adsorption configurations with hydrogen bonds on **Rh<sub>C</sub>-OH** and **Rh(100)<sub>OH</sub>**.

**Figure S6**

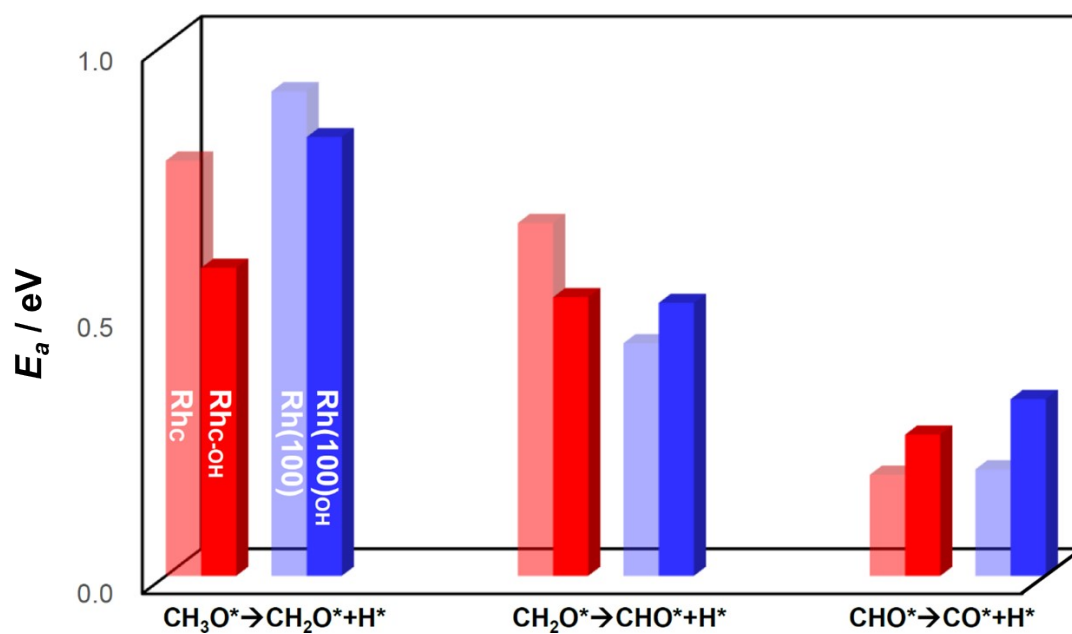

**Figure S6.** Comparison of  $E_a$  for the C-H cleavages of  $\text{CH}_3\text{O}^* \rightarrow \text{CH}_2\text{O}^* \rightarrow \text{CHO}^* \rightarrow \text{CO}^*$  on **Rh<sub>C</sub>** and **Rh(100)** without hydrogen bond, and on **Rh<sub>C</sub>-OH** and **Rh(100)<sub>OH</sub>** with hydrogen bond.
